# Supplementary material
Source: PubMed Central journal article supplement (PMC4400600)
Supplement: ajtr0007-0339-f5.pdf [file ajtr0007-0339-f5.pdf]

## Fibulin-1 and colorectal cancer

**Supplemental Table 1.** Histopathological Characteristics of CRC Patients from Whom the CRC Tissues and Paired NC Tissues Were Cultured for the Collection of CM

| Patient | Sex    | Age | Location         | Differentiation grading | TNM staging | UICC staging |
|---------|--------|-----|------------------|-------------------------|-------------|--------------|
| 1       | female | 83  | ascending colon  | Well-moderately         | T2N0M0      | I            |
| 2       | male   | 71  | descending colon | well                    | T3N0M0      | IIA          |
| 3       | female | 40  | rectum           | well                    | T2N1M0      | IIIA         |
| 4       | male   | 66  | Sigmoid colon    | Well-moderately         | T3N0M0      | IIA          |
| 5       | female | 45  | rectum           | well                    | T2N0M0      | I            |
| 6       | female | 41  | rectum           | well                    | T1N0M0      | I            |
| 7       | male   | 75  | rectum           | moderately              | T3N0M0      | IIA          |
| 8       | female | 70  | Sigmoid colon    | well                    | T3N0M0      | IIA          |
| 9       | female | 48  | Sigmoid colon    | Well-moderately         | T3N1M0      | IIIB         |
| 10      | male   | 47  | rectum           | well                    | T4N1M1      | IVA          |
| 11      | female | 56  | sigmoid colon    | well                    | T2N0M0      | I            |
| 12      | male   | 68  | rectum           | Well                    | T2N0M0      | I            |
| 13      | male   | 49  | Sigmoid colon    | well                    | T1N2M0      | IIIA         |
| 14      | female | 82  | rectum           | moderately              | T3N1M0      | IIIB         |
| 15      | male   | 68  | Transverse colon | well                    | T2N0M0      | I            |
| 16      | female | 39  | rectum           | well-moderately         | T2N0M0      | I            |
| 17      | female | 57  | rectum           | well                    | T1N0M0      | I            |
| 18      | male   | 69  | Sigmoid colon    | well-moderately         | T3N0M0      | IIA          |
| 19      | female | 74  | rectum           | moderately-poor         | T3N2M0      | IIIB         |
| 20      | male   | 63  | Ascending colon  | well                    | T1N0M0      | I            |
